# Supplementary material for: Preparation of surface molecularly imprinted polymer and its application for the selective extraction of teicoplanin from water
Source: Royal Society of Chemistry journal article supplement (doi:10.1039/d1ra00913c), 2021-01-01
Supplement: d1ra00913c1.pdf [file d1ra00913c1.pdf]

## Supporting information

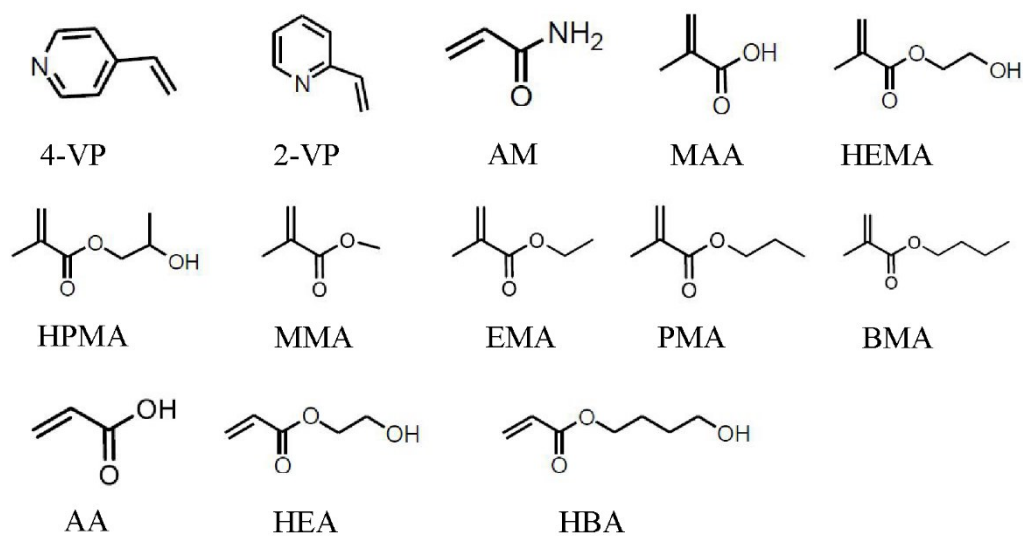

**Fig. S1** Chemical structures of the examined functional monomers

(4-VP) 4-vinyl pyridine, (2-VP) 2-vinyl pyridine, (AM) acrylamide, (MAA) methacrylic acid, (HEMA) hydroxyethyl methacrylate, (HPMA) 2-hydroxypropyl methacrylate, (MMA) methyl methacrylate, (EMA) ethyl methacrylate, (PMA) N-propyl methacrylate, (BMA) butyl methacrylate, (AA) acrylic acid, (HEA) hydroxyethyl acrylate and (HBA) hydroxybutyl acrylate.

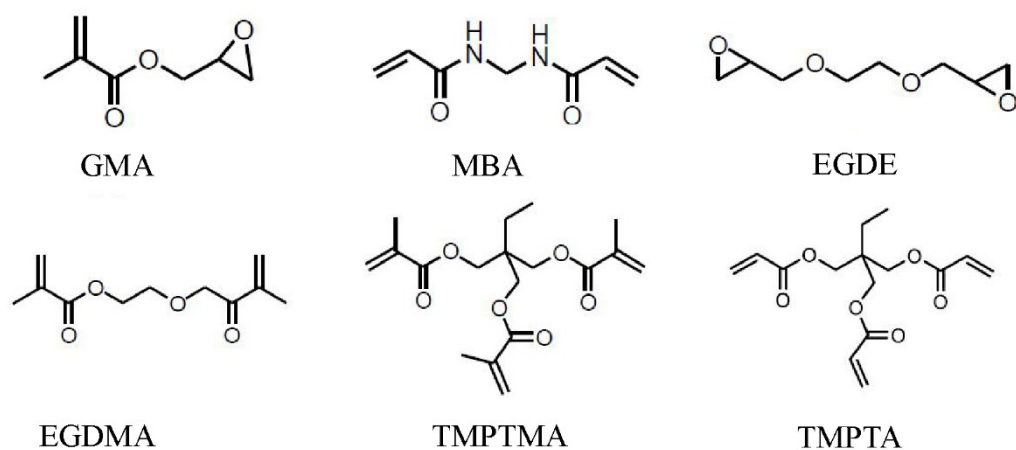

**Fig. S2** Chemical structures of the examined cross-linkers

(GMA) glycidyl methacrylate, (MBA) N, N'-methylenebisacrylamide, (EGDE) ethylene glycol diglycidyl ether, (EGDMA) ethylene glycol dimethacrylate, (TMPTMA) trimethylolpropane trimethacrylate and (TMPTA) trimethylolpropane triacrylate.

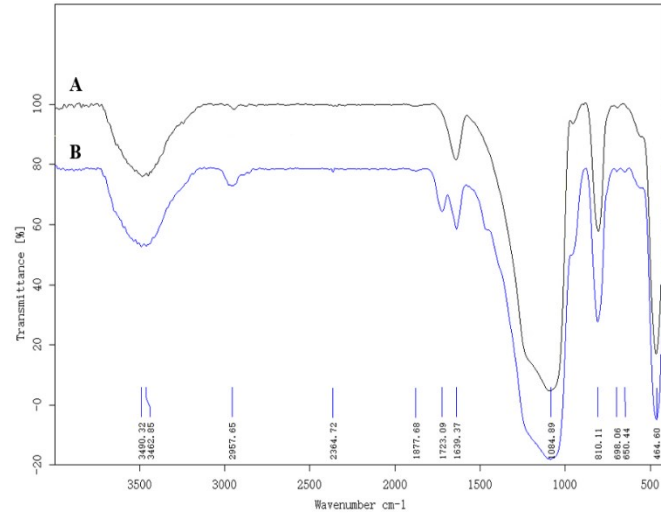

**Fig. S3** The FT-IR characterization of (A) modified silica gel and (B) surface molecularly imprinted polymer

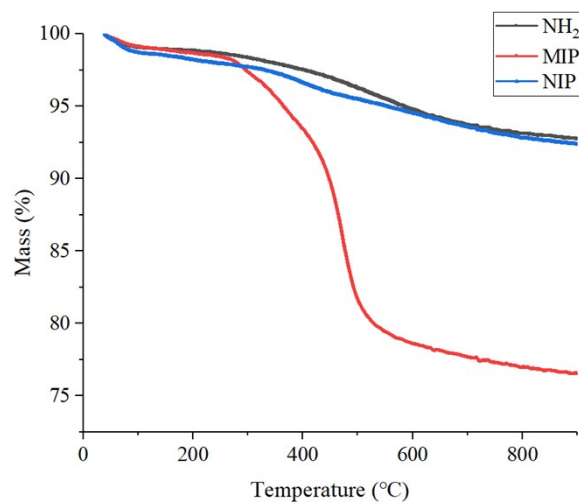

**Fig. S4** The thermogravimetric analysis of amino-modified silica gel, SMIP and NIP

SMIP, surface molecularly imprinted polymer; NIP, non-imprinted polymer.

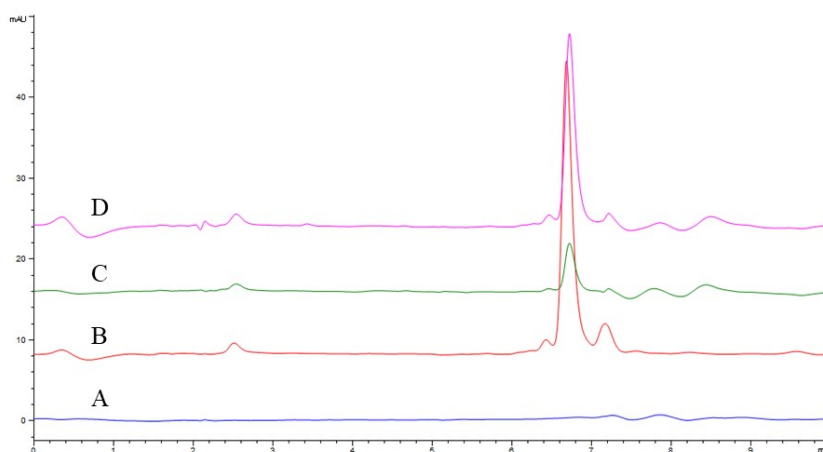

**Fig. S5** HPLC chromatograms of the blank real water samples (A), real water samples spiked with 10 mg/L TEC (B), TEC remaining in supernatant solution after extraction by SMIP(C) and NIP(D).
